# Supplementary material for: Genotyping by Sequencing and Genome–Environment Associations in Wild Common Bean Predict Widespread Divergent Adaptation to Drought
Source: PubMed Central journal article supplement (PMC5826387; doi:10.3389/fpls.2018.00128), 2018-02-21

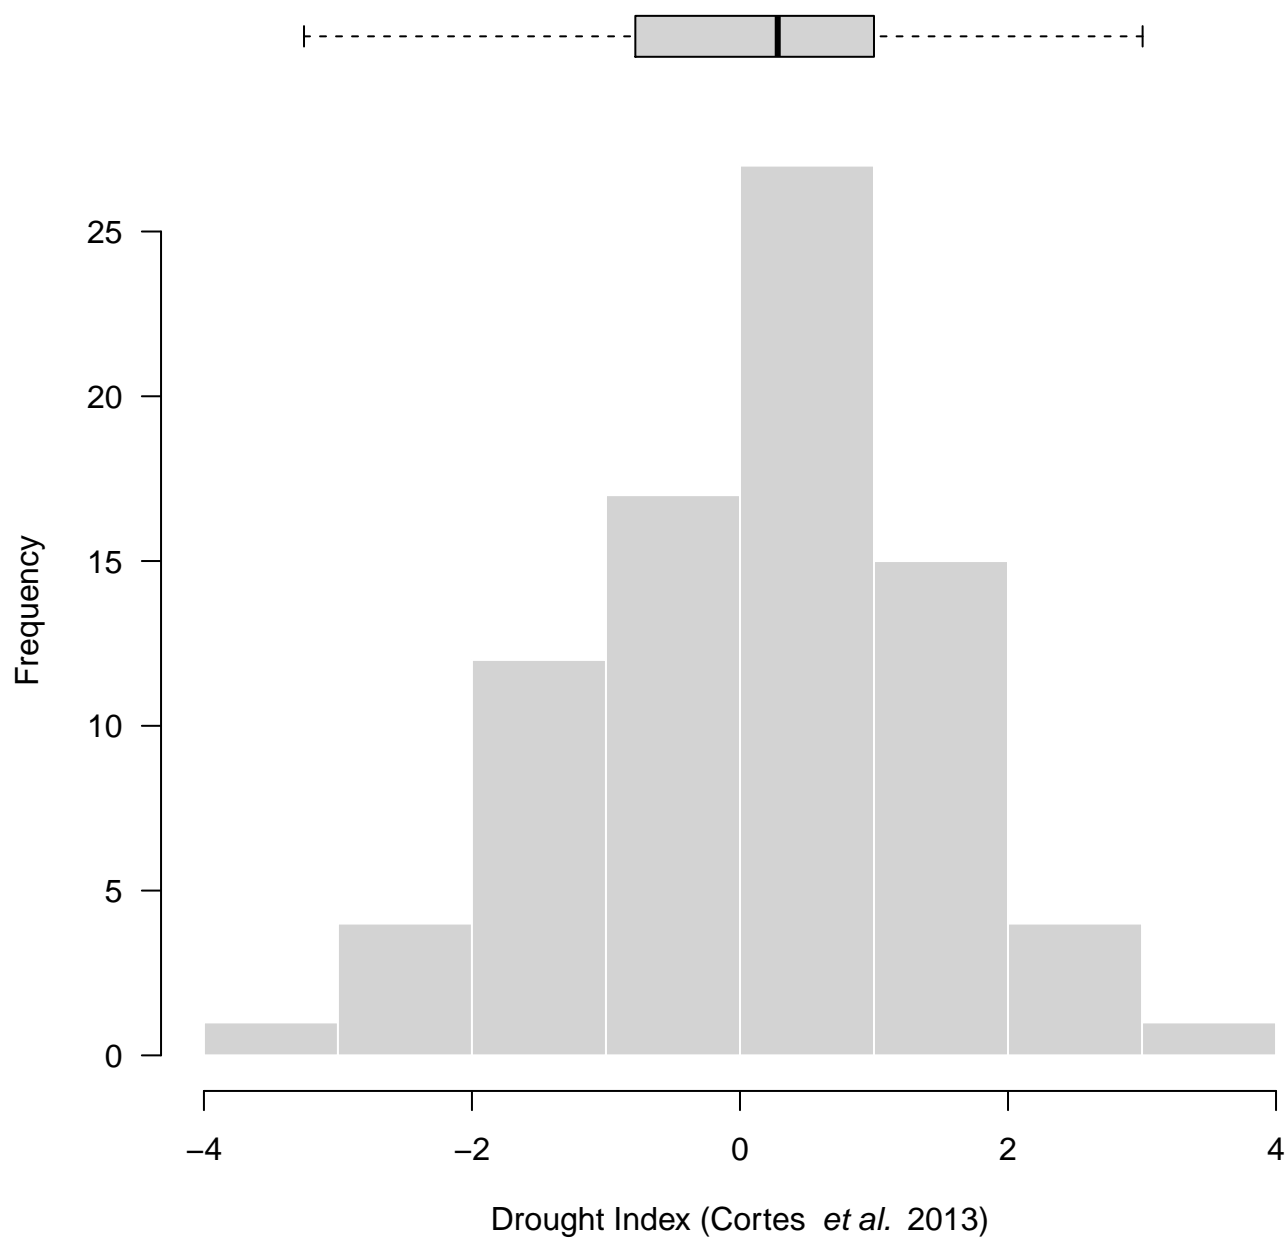

Supplement: Image_1.pdf [file Image_1.pdf]
