# Supplementary material for: Genotyping by Sequencing and Genome–Environment Associations in Wild Common Bean Predict Widespread Divergent Adaptation to Drought
Source: Front Plant Sci. 2018 Feb 21;9:128. doi: 10.3389/fpls.2018.00128 (PMC5826387; doi:10.3389/fpls.2018.00128)
Supplement: TABLE S2 — Statistics from the optimum association analysis for the 115 SNP markers associated with the bioclimatic-based drought index in 86 common bean accessions based on 22,845 GBS-derived SNP markers. Given are results of a mixed linear model (depicted in Figure 3) with a centered IBS kinship matrix as a random effect, and the first two PCoA axes scores (Figure 2) as covariates. Among other statistics, the F-value, the -log10 (P-value) and the variation explained (R2) by each marker, are shown. Marker names are given as chromosome and position on the common bean reference genome from Schmutz et al. (2014). Unique regions containing one or more SNPs are named with a consecutive number per chromosome under the column called “region.” Gray cells in this column mark regions with two or more associated SNPs. Regions are defined here as overlapping 1,000 bp sections that flanked associated markers. [file Table_2.xlsx]

## Sheet: Sheet1
marker	chr	pos	region	F_value	P_value	log_10_P_value	Rsq	marker_concatenated	add_F	add_p	dom_F	dom_p	marker_MS	error_MS	model_MS	pos_cum	chromosome	1000_flanking	1000_flanking_phytozome	gene_1	gene_2
1_5634877	1	5634877	1	34.5045	5.1585e-10	9.28748	0.5594	S1_5634877	27.9802	2.8449e-06	26.4795	4.8974e-06	68.9278	1.99765	50.1829	5634877	Chr01	5634377..5635377	Chr01:5634377..5635377	Phvul.001G050600	NA
1_43286182	1	43286182	2	25.8395	2.4171e-08	7.61671	0.49582	S1_43286182	14.8965	0.00033252	28.4404	2.5714e-06	58.2715	2.25513	42.2681	43286182	Chr01	43285682..43286682	Chr01:43285682..43286682	Phvul.001G169900	NA
1_45197183	1	45197183	3	31.1008	5.1628e-09	8.28711	0.57511	S1_45197183	26.3708	6.4925e-06	22.59	2.365e-05	67.7122	2.17719	48.0107	45197183	Chr01	45196683..45197683	Chr01:45196683..45197683	Phvul.001G186700	NA
1_45251899	1	45251899	4	26.0832	1.5769e-08	7.8022	0.47838	S1_45251899	16.4252	0.00016966	27.4017	3.1471e-06	61.9772	2.37613	45.9775	45251899	Chr01	45251399..45252399	Chr01:45251399..45252399	NA	NA
1_48791463	1	48791463	5	24.9351	2.7996e-08	7.5529	0.46773	S1_48791463	14.2243	0.00041667	28.2042	2.4068e-06	60.5978	2.43023	45.0579	48791463	Chr01	48790963..48791963	Chr01:48790963..48791963	Phvul.001G226300	NA
1_50075222	1	50075222	6	25.1404	3.7641e-08	7.42434	0.48921	S1_50075222	15.0936	0.00031296	27.0088	4.3085e-06	60.4436	2.40424	44.702	50075222	Chr01	50074722..50075722	Chr01:50074722..50075722	Phvul.001G240800	NA
1_51067156	1	51067156	7	28.1247	1.0501e-08	7.97877	0.51878	S1_51067156	16.7271	0.00016771	29.4111	2.0984e-06	63.3548	2.25263	46.8753	51067156	Chr01	51066656..51067656	Chr01:51066656..51067656	Phvul.001G253300	NA
1_51095906	1	51095906	8	26.219	2.0149e-08	7.69575	0.49947	S1_51095906	15.0892	0.00030756	28.7908	2.2961e-06	58.4662	2.22992	42.3592	51095906	Chr01	51095406..51096406	Chr01:51095406..51096406	Phvul.001G253800	NA
1_51143256	1	51143256	9	29.067	3.7588e-09	8.42495	0.50395	S1_51143256	21.9013	2.0877e-05	25.7913	5.4397e-06	65.2904	2.2462	48.1863	51143256	Chr01	51142756..51143756	Chr01:51142756..51143756	Phvul.001G254100	Phvul.001G254200
1_51995117	1	51995117	10	34.1983	3.7997e-10	9.42025	0.54195	S1_51995117	25.9293	4.9863e-06	28.6699	2.0627e-06	70.2136	2.05314	51.4685	51995117	Chr01	51994617..51995617	Chr01:51994617..51995617	Phvul.001G267600	NA
1_52026092	1	52026092	11	30.6076	1.8481e-09	8.73327	0.51609	S1_52026092	22.026	1.9946e-05	27.8263	2.7298e-06	66.8632	2.18453	49.2348	52026092	Chr01	52025592..52026592	Chr01:52025592..52026592	Phvul.001G268500	NA
2_960784	2	960784	1	24.6692	3.5183e-08	7.45367	0.46807	S1_53166415	15.5842	0.00024254	26.088	5.1201e-06	60.3908	2.44803	45.213	53119833	Chr02	960284..961284	Chr02:960284..961284	Phvul.002G008500	NA
2_1516604	2	1516604	2	27.0358	1.0989e-08	7.95904	0.48989	S1_53722235	18.8046	6.8366e-05	26.0358	5.2117e-06	63.2719	2.3403	47.0993	53675653	Chr02	1516104..1517104	Chr02:1516104..1517104	Phvul.002G013500	NA
2_2617546	2	2617546	3	27.0244	9.9443e-09	8.00243	0.48676	S1_54823177	17.7185	0.00010168	27.3513	3.2008e-06	63.0629	2.33356	46.7013	54776595	Chr02	2617046..2618046	Chr02:2617046..2618046	Phvul.002G024700	NA
2_4366953	2	4366953	4	37.735	1.4201e-10	9.84768	0.58061	S1_56572584	31.1623	1.0228e-06	27.4723	3.5263e-06	71.5497	1.89611	51.8167	56526002	Chr02	4366453..4367453	Chr02:4366453..4367453	Phvul.002G047100	NA
2_42471273	2	42471273	5	26.7904	1.1143e-08	7.953	0.4847	S1_94676904	20.3368	3.7283e-05	24.1789	9.5295e-06	62.7966	2.344	46.5238	94630322	Chr02	42470773..42471773	Chr02:42470773..42471773	Phvul.002G258500	NA
2_45609466	2	45609466	6	24.6305	3.2672e-08	7.48582	0.46482	S1_97815097	16.9336	0.00013855	24.6318	8.1301e-06	60.2213	2.44499	44.8069	97768515	Chr02	45608966..45609966	Chr02:45608966..45609966	Phvul.002G292700	NA
3_4794375	3	4794375	1	26.5068	2.7903e-08	7.55435	0.52097	S1_106041044	17.0127	0.00015792	26.3986	6.1055e-06	61.3455	2.31433	44.5577	105965438	Chr03	4793875..4794875	Chr03:4793875..4794875	Phvul.003G043000	NA
3_4794383	3	4794383	1	26.5068	2.7903e-08	7.55435	0.52097	S1_106041052	17.0127	0.00015792	26.3986	6.1055e-06	61.3455	2.31433	44.5577	105965446	Chr03	4793883..4794883	Chr03:4793883..4794883	Phvul.003G043000	NA
3_8705470	3	8705470	2	27.1679	9.2757e-09	8.03265	0.48801	S1_109952139	35.856	2.0114e-07	11.3459	0.00145	63.2251	2.3272	46.8094	109876533	Chr03	8704970..8705970	Chr03:8704970..8705970	Phvul.003G063000	NA
3_38794106	3	38794106	3	27.4724	8.917e-09	8.04978	0.49366	S1_140040775	20.3835	3.7662e-05	24.9779	7.4901e-06	63.7587	2.32083	47.4238	139965169	Chr03	38793606..38794606	Chr03:38793606..38794606	Phvul.003G176300	NA
3_39765307	3	39765307	4	30.4021	2.2927e-09	8.63965	0.51693	S1_141011976	23.9564	1.0307e-05	25.3907	6.4974e-06	66.6242	2.19143	49.399	140936370	Chr03	39764807..39765807	Chr03:39764807..39765807	Phvul.003G185600	NA
3_39997122	3	39997122	5	25.8852	1.7394e-08	7.7596	0.47657	S1_141243791	17.15	0.00012717	26.2822	4.5979e-06	61.7437	2.38529	45.8218	141168185	Chr03	39996622..39997622	Chr03:39996622..39997622	NA	NA
3_43164821	3	43164821	6	33.5811	4.9526e-10	9.30517	0.53773	S1_144411490	19.287	5.5462e-05	35.193	2.6173e-07	69.6668	2.07458	51.1039	144335884	Chr03	43164321..43165321	Chr03:43164321..43165321	Phvul.003G215800	NA
3_43174777	3	43174777	7	33.915	4.9301e-10	9.30714	0.53826	S1_144421446	19.4931	5.2616e-05	35.2471	2.7426e-07	69.2197	2.04098	51.7158	144345840	Chr03	43174277..43175277	Chr03:43174277..43175277	Phvul.003G216000	NA
3_43234621	3	43234621	8	38.2976	6.9867e-11	10.1557	0.56791	S1_144481290	26.7692	3.7374e-06	33.2327	4.7803e-07	73.5777	1.92121	53.7112	144405684	Chr03	43234121..43235121	Chr03:43234121..43235121	Phvul.003G216200	NA
3_44394282	3	44394282	9	59.9765	8.1376e-10	9.0895	0.53815	S1_145640951	59.9765	8.1376e-10	NA	NA	126.405	2.10758	70.0244	145565345	Chr03	44393782..44394782	Chr03:44393782..44394782	Phvul.003G224600	NA
3_45944334	3	45944334	10	26.6511	1.1928e-08	7.92343	0.48347	S1_147191003	15.6578	0.00023114	29.1639	1.7532e-06	62.6369	2.35026	46.4173	147115397	Chr03	45943834..45944834	Chr03:45943834..45944834	Phvul.003G236800	NA
3_47496295	3	47496295	11	25.9939	3.1344e-08	7.50385	0.49386	S1_148742964	16.5219	0.00018599	26.3579	5.8806e-06	58.7974	2.26197	45.4419	148667358	Chr03	47495795..47496795	Chr03:47495795..47496795	Phvul.003G248900	NA
3_47496322	3	47496322	11	25.9939	3.1344e-08	7.50385	0.49386	S1_148742991	16.5219	0.00018599	26.3579	5.8806e-06	58.7974	2.26197	45.4419	148667385	Chr03	47495822..47496822	Chr03:47495822..47496822	Phvul.003G248900	NA
3_48620888	3	48620888	12	30.749	2.8967e-09	8.5381	0.53458	S1_149867557	15.409	0.00027577	35.1319	3.4681e-07	61.5647	2.00217	45.409	149791951	Chr03	48620388..48621388	Chr03:48620388..48621388	Phvul.003G258200	NA
3_48646585	3	48646585	13	29.7828	6.6256e-09	8.17877	0.54164	S1_149893254	20.0977	5.0287e-05	27.5916	4.1668e-06	65.5919	2.20234	48.4315	149817648	Chr03	48646085..48647085	Chr03:48646085..48647085	Phvul.003G258300	NA
3_48646590	3	48646590	13	29.7828	6.6256e-09	8.17877	0.54164	S1_149893259	20.0977	5.0287e-05	27.5916	4.1668e-06	65.5919	2.20234	48.4315	149817653	Chr03	48646090..48647090	Chr03:48646090..48647090	Phvul.003G258300	NA
3_48646616	3	48646616	13	29.7828	6.6256e-09	8.17877	0.54164	S1_149893285	20.0977	5.0287e-05	27.5916	4.1668e-06	65.5919	2.20234	48.4315	149817679	Chr03	48646116..48647116	Chr03:48646116..48647116	Phvul.003G258300	NA
3_49985018	3	49985018	14	27.41	1.148e-08	7.94006	0.50992	S1_151231687	44.8221	1.9701e-08	5.69927	0.02096	59.9365	2.18667	43.3737	151156081	Chr03	49984518..49985518	Chr03:49984518..49985518	Phvul.003G274100	NA
3_50606820	3	50606820	15	24.354	3.7621e-08	7.42457	0.46215	S1_151853489	16.6576	0.00015462	24.517	8.4632e-06	59.8755	2.45855	44.5764	151777883	Chr03	50606320..50607320	Chr03:50606320..50607320	Phvul.003G280500	NA
3_50606821	3	50606821	15	24.354	3.7621e-08	7.42457	0.46215	S1_151853490	16.6576	0.00015462	24.517	8.4632e-06	59.8755	2.45855	44.5764	151777884	Chr03	50606321..50607321	Chr03:50606321..50607321	Phvul.003G280500	NA
3_52251117	3	52251117	16	26.4288	3.2704e-08	7.4854	0.52296	S1_153497786	20.3922	4.6837e-05	22.5007	2.3341e-05	63.3224	2.39596	46.3807	153422180	Chr03	52250617..52251617	Chr03:52250617..52251617	NA	NA
4_4721658	4	4721658	1	25.3627	2.7482e-08	7.56095	0.48524	S1_158252736	16.8468	0.00014953	25.5926	6.3187e-06	60.675	2.39229	44.286	158159649	Chr04	4721158..4722158	Chr04:4721158..4722158	Phvul.004G042000	NA
4_7759818	4	7759818	2	26.1336	1.5382e-08	7.81299	0.47883	S1_161290896	20.4021	3.6381e-05	23.1676	1.3638e-05	62.0363	2.37382	46.0169	161197809	Chr04	7759318..7760318	Chr04:7759318..7760318	Phvul.004G058200	NA
4_7759830	4	7759830	2	26.1336	1.5382e-08	7.81299	0.47883	S1_161290908	20.4021	3.6381e-05	23.1676	1.3638e-05	62.0363	2.37382	46.0169	161197821	Chr04	7759330..7760330	Chr04:7759330..7760330	Phvul.004G058200	NA
4_7759836	4	7759836	2	26.1336	1.5382e-08	7.81299	0.47883	S1_161290914	20.4021	3.6381e-05	23.1676	1.3638e-05	62.0363	2.37382	46.0169	161197827	Chr04	7759336..7760336	Chr04:7759336..7760336	Phvul.004G058200	NA
4_23420092	4	23420092	3	26.3399	1.9018e-08	7.72084	0.49731	S1_176951170	12.7366	0.000814	31.909	8.5832e-07	61.2039	2.32362	44.8693	176858083	Chr04	23419592..23420592	Chr04:23419592..23420592	NA	NA
4_25109528	4	25109528	4	27.3676	1.3144e-08	7.88127	0.50959	S1_178640606	13.7762	0.00053534	32.0481	8.7357e-07	62.5206	2.28447	46.0021	178547519	Chr04	25109028..25110028	Chr04:25109028..25110028	NA	NA
4_34895566	4	34895566	5	44.3751	1.2232e-11	10.9125	0.62433	S1_188426644	28.9027	2.1051e-06	38.0145	1.3998e-07	76.8191	1.73113	54.3307	188333557	Chr04	34895066..34896066	Chr04:34895066..34896066	Phvul.004G107100	NA
4_39927970	4	39927970	6	24.5595	3.3874e-08	7.47013	0.46414	S1_193459048	18.0154	9.0548e-05	23.3578	1.2744e-05	60.1329	2.44846	44.748	193365961	Chr04	39927470..39928470	Chr04:39927470..39928470	Phvul.004G124600	NA
4_39928786	4	39928786	6	31.1948	1.4172e-09	8.84857	0.52054	S1_193459864	22.5534	1.6462e-05	28.0877	2.5019e-06	67.4401	2.1619	49.6194	193366777	Chr04	39928286..39929286	Chr04:39928286..39929286	Phvul.004G124600	NA
4_40440084	4	40440084	7	26.6853	1.8053e-08	7.74345	0.50374	S1_193971162	15.1771	0.00030262	29.2584	2.0839e-06	61.8271	2.3169	45.526	193878075	Chr04	40439584..40440584	Chr04:40439584..40440584	Phvul.004G128700	NA
4_44029822	4	44029822	8	46.7963	1.5798e-08	7.8014	0.48503	S1_197560900	46.7963	1.5798e-08	NA	NA	73.511	1.57087	39.6498	197467813	Chr04	44029322..44030322	Chr04:44029322..44030322	Phvul.004G158300	NA
5_775211	5	775211	1	25.363	3.7666e-08	7.42405	0.49671	S1_200266408	13.9863	0.00049968	28.5432	2.7614e-06	60.4012	2.38147	44.5521	200012897	Chr05	774711..775711	Chr05:774711..775711	Phvul.005G008900	NA
5_3069369	5	3069369	2	26.624	1.8579e-08	7.73098	0.49766	S1_202560566	21.2447	3.008e-05	22.4913	1.9978e-05	63.9525	2.40206	48.0389	202307055	Chr05	3068869..3069869	Chr05:3068869..3069869	Phvul.005G033300	NA
5_4129691	5	4129691	3	41.9781	4.2277e-11	10.3739	0.62024	S1_203620888	28.4595	2.6899e-06	34.9432	3.9325e-07	71.0628	1.69285	50.425	203367377	Chr05	4129191..4130191	Chr05:4129191..4130191	Phvul.005G041300	NA
5_8813778	5	8813778	4	27.2359	1.1134e-08	7.95335	0.49984	S1_208304975	50.4515	4.1422e-09	2.50333	0.12004	46.0229	1.68979	33.784	208051464	Chr05	8813278..8814278	Chr05:8813278..8814278	NA	NA
5_10469238	5	10469238	5	26.6425	1.1978e-08	7.92162	0.48339	S1_209960435	19.5151	5.0848e-05	24.8277	7.593e-06	62.6271	2.35065	46.4108	209706924	Chr05	10468738..10469738	Chr05:10468738..10469738	Phvul.005G067200	NA
5_10469409	5	10469409	5	25.8151	1.9892e-08	7.70132	0.479	S1_209960606	18.7464	6.9905e-05	24.314	9.4315e-06	61.8664	2.39652	46.1623	209707095	Chr05	10468909..10469909	Chr05:10468909..10469909	Phvul.005G067200	NA
5_35099565	5	35099565	6	40.1468	3.3715e-11	10.4722	0.57857	S1_234590762	31.0377	9.0757e-07	31.2189	9.0167e-07	74.9578	1.86709	54.6312	234337251	Chr05	35099065..35100065	Chr05:35099065..35100065	Phvul.005G126600	NA
6_19849319	6	19849319	1	33.7118	6.1916e-10	9.2082	0.55003	S1_260159902	20.7695	3.3601e-05	33.2555	5.3427e-07	67.7663	2.01016	49.3031	259763792	Chr06	19848819..19849819	Chr06:19848819..19849819	Phvul.006G079500	NA
6_19849322	6	19849322	1	25.0575	3.1944e-08	7.49561	0.48023	S1_260159905	12.3799	0.00093453	30.4446	1.2833e-06	59.1658	2.3612	43.5695	259763795	Chr06	19848822..19849822	Chr06:19848822..19849822	Phvul.006G079500	NA
6_22527342	6	22527342	2	46.391	1.4328e-08	7.84381	0.46124	S1_262837925	46.391	1.4328e-08	NA	NA	118.882	2.56261	67.3693	262441815	Chr06	22526842..22527842	Chr06:22526842..22527842	Phvul.006G108900	NA
6_22527360	6	22527360	2	46.391	1.4328e-08	7.84381	0.46124	S1_262837943	46.391	1.4328e-08	NA	NA	118.882	2.56261	67.3693	262441833	Chr06	22526860..22527860	Chr06:22526860..22527860	Phvul.006G108900	NA
6_22652444	6	22652444	3	24.7501	3.0746e-08	7.51221	0.46597	S1_262963027	13.3254	0.00060785	28.9997	1.8503e-06	60.3697	2.43917	44.9059	262566917	Chr06	22651944..22652944	Chr06:22651944..22652944	Phvul.006G110800	NA
6_25618847	6	25618847	4	31.8068	3.8915e-09	8.40988	0.57371	S1_265929430	22.2351	2.5561e-05	27.6157	4.6339e-06	64.4034	2.02483	46.4903	265533320	Chr06	25618347..25619347	Chr06:25618347..25619347	NA	NA
6_25618853	6	25618853	4	31.8068	3.8915e-09	8.40988	0.57371	S1_265929436	22.2351	2.5561e-05	27.6157	4.6339e-06	64.4034	2.02483	46.4903	265533326	Chr06	25618353..25619353	Chr06:25618353..25619353	NA	NA
6_25774746	6	25774746	5	37.9562	3.8502e-10	9.41452	0.59104	S1_266085329	27.8484	4.0652e-06	29.5646	2.5479e-06	70.2649	1.85121	53.3391	265689219	Chr06	25774246..25775246	Chr06:25774246..25775246	Phvul.006G144100	NA
6_26125004	6	26125004	6	26.2194	1.4744e-08	7.83138	0.47961	S1_266435587	21.3594	2.5481e-05	22.3214	1.8486e-05	62.1367	2.36988	46.0839	266039477	Chr06	26124504..26125504	Chr06:26124504..26125504	Phvul.006G148200	NA
6_26830898	6	26830898	7	31.801	1.0806e-09	8.96634	0.52504	S1_267141481	25.3366	6.124e-06	26.0567	4.9663e-06	68.0233	2.13903	50.0082	266745371	Chr06	26830398..26831398	Chr06:26830398..26831398	Phvul.006G155400	NA
6_29445737	6	29445737	8	34.4507	3.4121e-10	9.46698	0.54365	S1_269756320	22.8838	1.4607e-05	32.2606	6.4804e-07	70.4341	2.04449	51.6154	269360210	Chr06	29445237..29446237	Chr06:29445237..29446237	Phvul.006G185400	NA
6_29445746	6	29445746	8	34.4507	3.4121e-10	9.46698	0.54365	S1_269756329	22.8838	1.4607e-05	32.2606	6.4804e-07	70.4341	2.04449	51.6154	269360219	Chr06	29445246..29446246	Chr06:29445246..29446246	Phvul.006G185400	NA
7_3457035	7	3457035	1	26.8379	1.0888e-08	7.96305	0.48512	S1_275744974	19.1027	5.9508e-05	25.5533	5.9042e-06	62.8509	2.34187	46.56	275332186	Chr07	3456535..3457535	Chr07:3456535..3457535	Phvul.007G043200	NA
7_7670795	7	7670795	2	35.2109	2.4744e-10	9.60653	0.54869	S1_279958734	28.5832	2.0279e-06	27.353	3.199e-06	71.0869	2.01889	52.0506	279545946	Chr07	7670295..7671295	Chr07:7670295..7671295	Phvul.007G079900	NA
7_44804240	7	44804240	3	25.2047	2.6909e-08	7.5701	0.47656	S1_317092179	17.7254	0.00010369	24.5122	8.8025e-06	61.1872	2.42761	45.1361	316679391	Chr07	44803740..44804740	Chr07:44803740..44804740	NA	NA
8_3161921	8	3161921	1	32.6229	3.3318e-09	8.47732	0.58938	S1_327208482	20.8504	4.2955e-05	29.999	2.3904e-06	63.9826	1.96128	45.5687	326767061	Chr08	3161421..3162421	Chr08:3161421..3162421	NA	NA
8_3297300	8	3297300	2	27.896	1.3189e-08	7.87979	0.52368	S1_327343861	14.1373	0.00047861	32.0974	9.7713e-07	60.331	2.16271	44.3626	326902440	Chr08	3296800..3297800	Chr08:3296800..3297800	Phvul.008G039100	NA
8_4065498	8	4065498	3	24.524	3.4493e-08	7.46227	0.4638	S1_328112059	15.8684	0.00021225	25.6556	5.6997e-06	60.0885	2.4502	44.7184	327670638	Chr08	4064998..4065998	Chr08:4064998..4065998	Phvul.008G046900	NA
8_9745242	8	9745242	4	35.2109	2.4744e-10	9.60653	0.54869	S1_333791803	28.5832	2.0279e-06	27.353	3.199e-06	71.0869	2.01889	52.0506	333350382	Chr08	9744742..9745742	Chr08:9744742..9745742	Phvul.008G094700	NA
8_9745404	8	9745404	4	34.0792	4.5986e-10	9.33737	0.5434	S1_333791965	27.4644	3.0814e-06	26.8002	4.0241e-06	70.0392	2.05519	51.6742	333350544	Chr08	9744904..9745904	Chr08:9744904..9745904	Phvul.008G094700	NA
8_10445211	8	10445211	5	27.7788	6.9123e-09	8.16038	0.49326	S1_334491772	21.0275	2.8812e-05	24.8755	7.4675e-06	63.9056	2.30051	47.2631	334050351	Chr08	10444711..10445711	Chr08:10444711..10445711	Phvul.008G098700	NA
8_10445233	8	10445233	5	31.4229	1.8903e-09	8.72347	0.53621	S1_334491794	22.6386	1.7645e-05	27.8172	3.1495e-06	65.7322	2.09186	48.2543	334050373	Chr08	10444733..10445733	Chr08:10444733..10445733	Phvul.008G098700	NA
8_10445234	8	10445234	5	26.4287	1.3301e-08	7.87612	0.48149	S1_334491795	18.0092	9.077e-05	26.1412	4.8248e-06	62.3804	2.36032	46.2463	334050374	Chr08	10444734..10445734	Chr08:10444734..10445734	Phvul.008G098700	NA
8_11055006	8	11055006	6	31.6437	4.1527e-09	8.38167	0.59878	S1_335101567	7.79769	0.00778	47.1253	2.2694e-08	47.4469	1.49941	31.8348	334660146	Chr08	11054506..11055506	Chr08:11054506..11055506	Phvul.008G101100	NA
8_14650681	8	14650681	7	45.5277	1.9262e-11	10.7153	0.63735	S1_338697242	30.2224	1.728e-06	36.7937	2.7011e-07	74.3021	1.63202	53.7834	338255821	Chr08	14650181..14651181	Chr08:14650181..14651181	Phvul.008G117300	NA
8_14751500	8	14751500	8	29.2139	7.3781e-09	8.13206	0.53512	S1_338798061	19.1192	6.9634e-05	28.0611	3.3985e-06	62.2596	2.13116	45.5976	338356640	Chr08	14751000..14752000	Chr08:14751000..14752000	NA	NA
8_19989717	8	19989717	9	27.7042	7.9866e-09	8.09764	0.49785	S1_344036278	22.2572	1.892e-05	23.383	1.3081e-05	64.4212	2.32532	47.5108	343594857	Chr08	19989217..19990217	Chr08:19989217..19990217	NA	NA
8_26221139	8	26221139	10	26.1737	1.6685e-08	7.77767	0.48551	S1_350267700	17.0403	0.00013562	26.7151	4.141e-06	62.3364	2.38164	45.9023	349826279	Chr08	26220639..26221639	Chr08:26220639..26221639	NA	NA
8_52409507	8	52409507	11	30.5579	1.8903e-09	8.72347	0.51571	S1_376456068	26.0542	4.7761e-06	23.692	1.1317e-05	66.8138	2.18646	49.2019	376014647	Chr08	52409007..52410007	Chr08:52409007..52410007	Phvul.008G212500	NA
8_53411845	8	53411845	12	30.7709	1.716e-09	8.76548	0.51734	S1_377458406	23.5379	1.1549e-05	26.4734	4.3077e-06	67.0249	2.17819	49.3426	377016985	Chr08	53411345..53412345	Chr08:53411345..53412345	Phvul.008G221600	Phvul.008G221700
8_53411889	8	53411889	12	30.7709	1.716e-09	8.76548	0.51734	S1_377458450	23.5379	1.1549e-05	26.4734	4.3077e-06	67.0249	2.17819	49.3426	377017029	Chr08	53411389..53412389	Chr08:53411389..53412389	Phvul.008G221600	NA
8_53411890	8	53411890	12	30.7709	1.716e-09	8.76548	0.51734	S1_377458451	23.5379	1.1549e-05	26.4734	4.3077e-06	67.0249	2.17819	49.3426	377017030	Chr08	53411390..53412390	Chr08:53411390..53412390	Phvul.008G221600	NA
8_53411898	8	53411898	12	27.9697	8.8525e-09	8.05293	0.50333	S1_377458459	20.8555	3.3561e-05	24.9081	8.3183e-06	64.4404	2.30394	48.4885	377017038	Chr08	53411398..53412398	Chr08:53411398..53412398	Phvul.008G221600	NA
8_53411918	8	53411918	12	28.7051	5.6067e-09	8.25129	0.50579	S1_377458479	21.5189	2.5536e-05	25.3931	6.7628e-06	64.8167	2.25802	48.5524	377017058	Chr08	53411418..53412418	Chr08:53411418..53412418	Phvul.008G221600	NA
8_53411925	8	53411925	12	28.7051	5.6067e-09	8.25129	0.50579	S1_377458486	21.5189	2.5536e-05	25.3931	6.7628e-06	64.8167	2.25802	48.5524	377017065	Chr08	53411425..53412425	Chr08:53411425..53412425	Phvul.008G221600	NA
8_54634639	8	54634639	13	26.498	1.2856e-08	7.89089	0.48211	S1_378681200	20.7908	3.1462e-05	23.2922	1.3045e-05	62.4605	2.35718	46.2997	378239779	Chr08	54634139..54635139	Chr08:54634139..54635139	Phvul.008G231700	NA
8_54634657	8	54634657	13	26.498	1.2856e-08	7.89089	0.48211	S1_378681218	20.7908	3.1462e-05	23.2922	1.3045e-05	62.4605	2.35718	46.2997	378239797	Chr08	54634157..54635157	Chr08:54634157..54635157	Phvul.008G231700	NA
8_54634761	8	54634761	13	26.498	1.2856e-08	7.89089	0.48211	S1_378681322	20.7908	3.1462e-05	23.2922	1.3045e-05	62.4605	2.35718	46.2997	378239901	Chr08	54634261..54635261	Chr08:54634261..54635261	Phvul.008G231700	NA
8_55223837	8	55223837	14	28.6819	6.3856e-09	8.1948	0.51745	S1_379270398	20.4178	3.941e-05	26.3732	5.0741e-06	63.6831	2.22032	46.5221	378828977	Chr08	55223337..55224337	Chr08:55223337..55224337	NA	NA
8_55223852	8	55223852	14	28.6819	6.3856e-09	8.1948	0.51745	S1_379270413	20.4178	3.941e-05	26.3732	5.0741e-06	63.6831	2.22032	46.5221	378828992	Chr08	55223352..55224352	Chr08:55223352..55224352	NA	NA
8_55279132	8	55279132	15	30.5579	1.8903e-09	8.72347	0.51571	S1_379325693	26.0542	4.7761e-06	23.692	1.1317e-05	66.8138	2.18646	49.2019	378884272	Chr08	55278632..55279632	Chr08:55278632..55279632	Phvul.008G238500	NA
8_55705313	8	55705313	16	38.6435	3.0184e-10	9.52022	0.59847	S1_379751874	23.4469	1.6944e-05	35.1947	4.9669e-07	65.5837	1.69714	49.2975	379310453	Chr08	55704813..55705813	Chr08:55704813..55705813	Phvul.008G242800	NA
8_56243789	8	56243789	17	27.6375	7.3968e-09	8.13096	0.49206	S1_380290350	36.5589	1.6264e-07	11.4025	0.00141	63.7495	2.30663	47.159	379848929	Chr08	56243289..56244289	Chr08:56243289..56244289	Phvul.008G247700	NA
8_57249436	8	57249436	18	27.5261	7.8035e-09	8.10771	0.4911	S1_381295997	21.8789	2.1049e-05	23.6453	1.1506e-05	63.6259	2.31148	47.0767	380854576	Chr08	57248936..57249936	Chr08:57248936..57249936	Phvul.008G259800	NA
8_59392111	8	59392111	19	29.067	3.7588e-09	8.42495	0.50395	S1_383438672	21.9013	2.0877e-05	25.7913	5.4397e-06	65.2904	2.2462	48.1863	382997251	Chr08	59391611..59392611	Chr08:59391611..59392611	Phvul.008G291200	NA
8_59429630	8	59429630	20	29.2589	3.8612e-09	8.41328	0.50919	S1_383476191	18.6647	7.2128e-05	29.4434	1.6804e-06	65.918	2.25292	48.7553	383034770	Chr08	59429130..59430130	Chr08:59429130..59430130	Phvul.008G291800	NA
8_59462830	8	59462830	21	31.4589	1.6285e-09	8.78821	0.53452	S1_383509391	20.5372	3.6609e-05	30.3324	1.3299e-06	66.2437	2.10572	48.228	383067970	Chr08	59462330..59463330	Chr08:59462330..59463330	Phvul.008G292100	NA
9_11708837	9	11708837	1	33.4942	9.0799e-10	9.04192	0.55431	S1_395418030	21.6126	2.6349e-05	31.5984	1.0027e-06	67.8101	2.02454	49.8379	394964033	Chr09	11708337..11709337	Chr09:11708337..11709337	Phvul.009G069100	NA
9_19786609	9	19786609	2	26.5312	1.2649e-08	7.89794	0.4824	S1_403495802	22.7547	1.5305e-05	21.3867	2.5986e-05	62.4989	2.35568	46.3253	403041805	Chr09	19786109..19787109	Chr09:19786109..19787109	NA	NA
9_25907901	9	25907901	3	30.5579	1.8903e-09	8.72347	0.51571	S1_409617094	26.0542	4.7761e-06	23.692	1.1317e-05	66.8138	2.18646	49.2019	409163097	Chr09	25907401..25908401	Chr09:25907401..25908401	Phvul.009G177300	NA
9_31528587	9	31528587	4	28.9658	5.6128e-09	8.25082	0.51675	S1_415237780	20.2063	4.2608e-05	27.0025	4.1168e-06	65.0563	2.24597	47.995	414783783	Chr09	31528087..31529087	Chr09:31528087..31529087	Phvul.009G213000	NA
9_32391895	9	32391895	5	24.8136	2.9771e-08	7.52621	0.46657	S1_416101088	16.143	0.00019	25.7887	5.4445e-06	60.4483	2.43609	44.9582	415647091	Chr09	32391395..32392395	Chr09:32391395..32392395	Phvul.009G217900	NA
9_32906856	9	32906856	6	26.8379	1.0888e-08	7.96305	0.48512	S1_416616049	19.1027	5.9508e-05	25.5533	5.9042e-06	62.8509	2.34187	46.56	416162052	Chr09	32906356..32907356	Chr09:32906356..32907356	Phvul.009G222100	NA
9_37039368	9	37039368	7	26.2194	1.4744e-08	7.83138	0.47961	S1_420748561	21.3594	2.5481e-05	22.3214	1.8486e-05	62.1367	2.36988	46.0839	420294564	Chr09	37038868..37039868	Chr09:37038868..37039868	Phvul.009G257600	NA
9_37064739	9	37064739	8	29.067	3.7588e-09	8.42495	0.50395	S1_420773932	21.9013	2.0877e-05	25.7913	5.4397e-06	65.2904	2.2462	48.1863	420319935	Chr09	37064239..37065239	Chr09:37064239..37065239	Phvul.009G258300	NA
9_37310073	9	37310073	9	33.971	7.4652e-10	9.12696	0.55607	S1_421019266	20.3054	4.2339e-05	33.7728	5.1869e-07	64.152	1.88843	47.3263	420565269	Chr09	37309573..37310573	Chr09:37309573..37310573	Phvul.009G260800	NA
10_41408193	10	41408193	1	25.2085	2.6858e-08	7.57093	0.47771	S1_462587094	18.173	8.7161e-05	24.0356	1.0396e-05	61.4201	2.43649	45.1069	462126654	Chr10	41407693..41408693	Chr10:41407693..41408693	Phvul.010G142000	NA
10_41408198	10	41408198	1	25.2085	2.6858e-08	7.57093	0.47771	S1_462587099	18.173	8.7161e-05	24.0356	1.0396e-05	61.4201	2.43649	45.1069	462126659	Chr10	41407698..41408698	Chr10:41407698..41408698	Phvul.010G142000	NA
11_3881959	11	3881959	1	25.2429	2.3972e-08	7.6203	0.47063	S1_468336111	21.2612	2.6422e-05	21.0335	2.9594e-05	60.9738	2.41548	45.3086	467828107	Chr11	3881459..3882459	Chr11:3881459..3882459	Phvul.011G045000	NA
