# Supplementary material for: Genotyping by Sequencing and Genome–Environment Associations in Wild Common Bean Predict Widespread Divergent Adaptation to Drought
Source: Front Plant Sci. 2018 Feb 21;9:128. doi: 10.3389/fpls.2018.00128 (PMC5826387; doi:10.3389/fpls.2018.00128)
Supplement: TABLE S3 — List of 77 genes in the 75 associated regions that contained at least one gene. The position of each gene and its functional description are shown together with other identifiers and descriptors. The list of associated SNP markers surrounding each gene is also depicted, for a total of 99 SNPs. Genes co-occurring in the same region are marked with gray cell under the column “associated SNPs.” Regions are defined here as overlapping 1,000 bp sections that flanked associated markers. [file Table_3.xlsx]

## Sheet: Sheet4
Gene Name	Transcript Name	Chromosome	Gene Start (bp)	Gene End (bp)	Description	Associated SNPs	PFAM ID	PFAM Description	Panther ID	Panther Description	KOG Desctiption	EC Description	KO Description	KO ID	EC ID	KOG ID	GO ID
Phvul.001G050600	Phvul.001G050600.1	Chr01	5474009	5477088	(M=1) PTHR23160:SF7 - MYOSIN HEAVY CHAIN-RELATED PROTEIN	1_5634877			PTHR23160	MYOSIN HEAVY CHAIN-RELATED	E3 ubiquitin ligase involved in syntaxin degradation					KOG0978
Phvul.001G169900	Phvul.001G169900.1	Chr01	42658014	42664629	(M=1) K03254 - translation initiation factor 3 subunit A (EIF3A)	1_43286182	PF01399	PCI domain	PTHR14005	EUKARYOTIC TRANSLATION INITIATION FACTOR 3, THETA SUBUNIT			translation initiation factor eIF-3 subunit 10	K03254			GO:0005515
Phvul.001G186700	Phvul.001G186700.2	Chr01	44485047	44491299		1_45197183	PF04818	RNA polymerase II-binding domain.	PTHR15921	PRE-MRNA CLEAVAGE COMPLEX II	mRNA cleavage and polyadenylation factor I/II complex, subunit Pcf11		pre-mRNA cleavage complex 2 protein Pcf11	K14400		KOG2071
Phvul.001G226300	Phvul.001G226300.1	Chr01	48090648	48091967	(M=123) PTHR24078 - DNAJ HOMOLOG SUBFAMILY C MEMBER	1_48791463	PF00226	DnaJ domain	PTHR24078	DNAJ HOMOLOG SUBFAMILY C MEMBER
Phvul.001G240800	Phvul.001G240800.1	Chr01	49361483	49363807	(M=94) PF02458 - Transferase family (Transferase)	1_50075222	PF02458	Transferase family	PTHR31896	FAMILY NOT NAMED							GO:0016747
Phvul.001G253300	Phvul.001G253300.1	Chr01	50350188	50354056	(M=22) K07904 - Ras-related protein Rab-11A (RAB11A)	1_51067156	PF00025	ADP-ribosylation factor family	PTHR24073	FAMILY NOT NAMED	GTPase Rab11/YPT3, small G protein superfamily		Ras-related protein Rab-11A	K07904		KOG0087	GO:0005525
Phvul.001G253800	Phvul.001G253800.2	Chr01	50378165	50379892	(M=11) K11253 - histone H3 (H3)	1_51095906	PF00125	Core histone H2A/H2B/H3/H4	PTHR11426	HISTONE H3	Histones H3 and H4		histone H3	K11253		KOG1745	GO:0003677
Phvul.001G254100	Phvul.001G254100.1	Chr01	50419088	50425942	(M=1) PTHR18934:SF140 - HELICASE , IBR AND ZINC FINGER PROTEIN DOMAIN-CONTAINING PROTEIN	1_51143256	PF00270	DEAD/DEAH box helicase	PTHR18934	ATP-DEPENDENT RNA HELICASE		RNA helicase.	ATP-dependent RNA helicase DHX8/PRP22 [EC:3.6.4.13]	K12818	3.6.4.13		GO:0005524
Phvul.001G254200	Phvul.001G254200.1	Chr01	50426212	50426793		1_51143256			PTHR33868
Phvul.001G267600	Phvul.001G267600.8	Chr01	51276757	51282429		1_51995117	PF00566	Rab-GTPase-TBC domain	PTHR22957	TBC1 DOMAIN FAMILY MEMBER GTPASE-ACTIVATING PROTEIN	GTPase-activating protein					KOG4567
Phvul.001G268500	Phvul.001G268500.3	Chr01	51320515	51322815		1_52026092	PF01535	PPR repeat	PTHR24015	FAMILY NOT NAMED
Phvul.002G008500	Phvul.002G008500.1	Chr02	917643	918471		2_960784
Phvul.002G013500	Phvul.002G013500.1	Chr02	1470618	1472804	(M=5) PTHR10795//PTHR10795:SF388 - PROPROTEIN CONVERTASE SUBTILISIN/KEXIN // SUBFAMILY NOT NAMED	2_1516604	PF05922	Peptidase inhibitor I9	PTHR10795	PROPROTEIN CONVERTASE SUBTILISIN/KEXIN		Tripeptidyl-peptidase II.			3.4.14.10		GO:0006508
Phvul.002G024700	Phvul.002G024700.1	Chr02	2567433	2571801		2_2617546			PTHR31060	FAMILY NOT NAMED
Phvul.002G047100	Phvul.002G047100.1	Chr02	4357492	4365538	(M=2) PTHR10026//PTHR10026:SF67 - CYCLIN // SUBFAMILY NOT NAMED	2_4366953	PF00134	Cyclin, N-terminal domain	PTHR10026	CYCLIN	CDK9 kinase-activating protein cyclin T			K15188		KOG0834	GO:0019901
Phvul.002G258500	Phvul.002G258500.1	Chr02	43019034	43021820	(M=3) PTHR31263:SF0 - CELLULASE (GLYCOSYL HYDROLASE FAMILY 5) PROTEIN-RELATED	2_42471273	PF00150	Cellulase (glycosyl hydrolase family 5)	PTHR31263	FAMILY NOT NAMED		Cellulase.			3.2.1.4		GO:0005975
Phvul.002G292700	Phvul.002G292700.1	Chr02	46164789	46166478	(M=9) PF05633 - Protein of unknown function (DUF793) (DUF793)	2_45609466	PF05633	Protein of unknown function (DUF793)	PTHR31509	FAMILY NOT NAMED
Phvul.003G043000	Phvul.003G043000.1	Chr03	4934723	4936942	(M=2) PTHR32227:SF56 - CARBOHYDRATE-BINDING X8 DOMAIN-CONTAINING PROTEIN	3_4794375, 3_4794383	PF07983	X8 domain	PTHR32227	FAMILY NOT NAMED
Phvul.003G063000	Phvul.003G063000.4	Chr03	8883648	8884547		3_8705470	PF04832	SOUL heme-binding protein	PTHR11220	HEME-BINDING PROTEIN-RELATED
Phvul.003G176300	Phvul.003G176300.1	Chr03	39927667	39948098	(M=1) K09533 - DnaJ homolog subfamily C member 13 (DNAJC13)	3_38794106	PF00226	DnaJ domain	PTHR36983				DnaJ homolog subfamily C member 13	K09533
Phvul.003G185600	Phvul.003G185600.1	Chr03	40897737	40908009	(M=2) PTHR31267:SF2 - DENTIN SIALOPHOSPHOPROTEIN-LIKE PROTEIN	3_39765307			PTHR31267	FAMILY NOT NAMED
Phvul.003G215800	Phvul.003G215800.1	Chr03	44306609	44311727	(M=1) PTHR10381:SF15 - ATP-DEPENDENT CLP PROTEASE PROTEOLYTIC SUBUNIT-RELATED PROTEIN 2, CHLOROPLASTIC	3_43164821	PF00574	Clp protease	PTHR10381	ATP-DEPENDENT CLP PROTEASE PROTEOLYTIC SUBUNIT	ATP-dependent Clp protease, proteolytic subunit	Endopeptidase Clp.	ATP-dependent Clp protease, protease subunit [EC:3.4.21.92]	K01358	3.4.21.92	KOG0840
Phvul.003G216000	Phvul.003G216000.1	Chr03	44318579	44323527	(M=1) PTHR31500:SF7 - AT HOOK MOTIF DNA-BINDING FAMILY PROTEIN-RELATED	3_43174777	PF03479	Domain of unknown function (DUF296)	PTHR31500	FAMILY NOT NAMED
Phvul.003G216200	Phvul.003G216200.1	Chr03	44377184	44379047	(M=2) PTHR31100:SF15 - AT-HOOK MOTIF NUCLEAR LOCALIZED PROTEIN 24-RELATED	3_43234621	PF03479	Domain of unknown function (DUF296)	PTHR31100	FAMILY NOT NAMED
Phvul.003G224600	Phvul.003G224600.1	Chr03	45519986	45521531	(M=4) PTHR31692:SF10 - EXPANSIN-LIKE B1	3_44394282	PF03330	Rare lipoprotein A (RlpA)-like double-psi beta-barrel	PTHR31692	FAMILY NOT NAMED
Phvul.003G236800	Phvul.003G236800.1	Chr03	47066050	47070266	(M=21) PF00651//PF03000 - BTB/POZ domain (BTB) // NPH3 family (NPH3)	3_45944334	PF00651	BTB/POZ domain	PTHR32370	FAMILY NOT NAMED							GO:0005515
Phvul.003G248900	Phvul.003G248900.1	Chr03	48628812	48633978	(M=2) PTHR10218:SF222 - EXTRA-LARGE GUANINE NUCLEOTIDE-BINDING PROTEIN 1	3_47496295, 3_47496322	PF00503	G-protein alpha subunit	PTHR10218	GTP-BINDING PROTEIN ALPHA SUBUNIT	G-protein alpha subunit (small G protein superfamily)					KOG0082	GO:0031683
Phvul.003G258200	Phvul.003G258200.2	Chr03	49763928	49789694		3_48620888	PF13589	Histidine kinase-, DNA gyrase B-, and HSP90-like ATPase	PTHR23336	ZINC FINGER CW-TYPE COILED-COIL DOMAIN PROTEIN 3.	MORC family ATPases					KOG1845
Phvul.003G258300	Phvul.003G258300.1	Chr03	49791140	49796926	(M=2) PTHR23421:SF79 - BETA-GALACTOSIDASE 3	3_48646585, 3_48646590, 3_48646616	PF02140	Galactose binding lectin domain	PTHR23421	BETA-GALACTOSIDASE RELATED		Beta-galactosidase.			3.2.1.23		GO:0030246
Phvul.003G274100	Phvul.003G274100.1	Chr03	51137944	51141464	(M=3) PTHR32054:SF2 - PROTEIN WEAK CHLOROPLAST MOVEMENT UNDER BLUE LIGHT 1-RELATED	3_49985018	PF05701	Weak chloroplast movement under blue light	PTHR32054	FAMILY NOT NAMED
Phvul.003G280500	Phvul.003G280500.1	Chr03	51761345	51763660	(M=2) PTHR33914:SF2 - 18S PRE-RIBOSOMAL ASSEMBLY PROTEIN GAR2-RELATED PROTEIN	3_50606820, 3_50606821			PTHR33914
Phvul.004G042000	Phvul.004G042000.1	Chr04	4979120	4980534	(M=3) K19307 - 25S rRNA (uracil2634-N3)-methyltransferase [EC:2.1.1.313] (BMT5)	4_4721658	PF10354	Domain of unknown function (DUF2431)	PTHR11538	PHENYLALANYL-TRNA SYNTHETASE	Uncharacterized conserved protein			K19307		KOG4174
Phvul.004G058200	Phvul.004G058200.1	Chr04	8075267	8080663	(M=6) K17604 - zinc finger SWIM domain-containing protein 3 (ZSWIM3)	4_7759818, 4_7759830, 4_7759836	PF04434	SWIM zinc finger	PTHR31669	FAMILY NOT NAMED				K17604			GO:0008270
Phvul.004G107100	Phvul.004G107100.1	Chr04	35372417	35373395	(M=9) PTHR22814:SF129 - COPPER TRANSPORT FAMILY PROTEIN-RELATED	4_34895566	PF00403	Heavy-metal-associated domain	PTHR22814	COPPER TRANSPORT PROTEIN ATOX1-RELATED	Copper chaperone					KOG1603	GO:0046872
Phvul.004G124600	Phvul.004G124600.1	Chr04	41968196	41970541	(M=2) PTHR10795:SF322 - SUBTILISIN SERINE PROTEASE-RELATED	4_39927970, 4_39928786	PF02225	PA domain	PTHR10795	PROPROTEIN CONVERTASE SUBTILISIN/KEXIN		Cucumisin.			3.4.21.25		GO:0006508
Phvul.004G128700	Phvul.004G128700.1	Chr04	42476895	42485816	(M=1) PTHR11262:SF4 - ATP-DEPENDENT CLP PROTEASE ATP-BINDING SUBUNIT CLPX-LIKE, MITOCHONDRIAL	4_40440084	PF10431	C-terminal, D2-small domain, of ClpB protein	PTHR11262	HSL AND CLP PROTEASE			ATP-dependent Clp protease ATP-binding subunit ClpX	K03544			GO:0005524
Phvul.004G158300	Phvul.004G158300.1	Chr04	46267391	46268336	(M=53) PF00139 - Legume lectin domain (Lectin_legB)	4_44029822	PF00139	Legume lectin domain	PTHR32401	FAMILY NOT NAMED							GO:0030246
Phvul.005G008900	Phvul.005G008900.1	Chr05	770602	779119	(M=1) PTHR27003:SF29 - U-BOX DOMAIN-CONTAINING PROTEIN 35-RELATED	5_775211	PF04564	U-box domain	PTHR27003		Serine/threonine protein kinase	Non-specific serine/threonine protein kinase.			2.7.11.1	KOG1187	GO:0016567
Phvul.005G033300	Phvul.005G033300.1	Chr05	3053899	3059685	(M=2) PTHR10774:SF61 - ELONGATION DEFECTIVE 1	5_3069369			PTHR10774	EXTENDED SYNAPTOTAGMIN-RELATED
Phvul.005G041300	Phvul.005G041300.1	Chr05	4186299	4188322	(M=197) PF01535//PF13041 - PPR repeat (PPR) // PPR repeat family (PPR_2)	5_4129691	PF13041	PPR repeat family	PTHR24015	FAMILY NOT NAMED
Phvul.005G067200	Phvul.005G067200.1	Chr05	11427269	11436137	(M=2) PF14929 - TAF RNA Polymerase I subunit A (TAF1_subA)	5_10469238, 5_10469409	PF14929	TAF RNA Polymerase I subunit A	PTHR36720
Phvul.005G126600	Phvul.005G126600.1	Chr05	36416125	36416925	(M=180) PF00847 - AP2 domain (AP2)	5_35099565	PF00847	AP2 domain	PTHR31839	FAMILY NOT NAMED							GO:0006355
Phvul.006G079500	Phvul.006G079500.1	Chr06	19157062	19160060	(M=4) 6.2.1.8 - Oxalate--CoA ligase / Oxalyl-CoA synthetase	6_19849319, 6_19849322	PF13193	AMP-binding enzyme C-terminal domain	PTHR24095	FAMILY NOT NAMED	Acyl-CoA synthetase	Oxalate--CoA ligase.			6.2.1.8	KOG1176	GO:0008152
Phvul.006G108900	Phvul.006G108900.1	Chr06	21820006	21823435	(M=5) PTHR10460 - ABL INTERACTOR	6_22527342, 6_22527360			PTHR10460	ABL INTERACTOR
Phvul.006G110800	Phvul.006G110800.1	Chr06	21951276	21956343	(M=14) K14684 - solute carrier family 25 (mitochondrial phosphate transporter), member 23/24/25/41 (SLC25A23S)	6_22652444	PF00153	Mitochondrial carrier protein	PTHR24089	FAMILY NOT NAMED	Mitochondrial solute carrier protein			K14684		KOG0752
Phvul.006G144100	Phvul.006G144100.1	Chr06	24988223	24989885		6_25774746			PTHR31903	FAMILY NOT NAMED
Phvul.006G148200	Phvul.006G148200.1	Chr06	25338840	25340144	(M=10) PF14476 - Petal formation-expressed (Chloroplast_duf)	6_26125004	PF14476	Petal formation-expressed	PTHR33358
Phvul.006G155400	Phvul.006G155400.2	Chr06	26046202	26048282	(M=1) PTHR23117//PTHR23117:SF12 - GUANYLATE KINASE-RELATED // SUBFAMILY NOT NAMED	6_26830898	PF00625	Guanylate kinase	PTHR23117	GUANYLATE KINASE-RELATED	Guanylate kinase	Guanylate kinase.	guanylate kinase [EC:2.7.4.8]	K00942	2.7.4.8	KOG0707
Phvul.006G185400	Phvul.006G185400.1	Chr06	28658728	28665484		6_29445737, 6_29445746	PF00179	Ubiquitin-conjugating enzyme	PTHR24067	UBIQUITIN-CONJUGATING ENZYME E2	Ubiquitin-conjugating enzyme	Ubiquitin--protein ligase.	ubiquitin-conjugating enzyme E2 O [EC:6.3.2.19]	K10581	6.3.2.19	KOG0895
Phvul.007G043200	Phvul.007G043200.1	Chr07	3515278	3520525	(M=1) PTHR31669:SF21 - PROTEIN FAR-RED IMPAIRED RESPONSE 1	7_3457035	PF04434	SWIM zinc finger	PTHR31669	FAMILY NOT NAMED							GO:0008270
Phvul.007G079900	Phvul.007G079900.1	Chr07	7834129	7837930	(M=2) PTHR16517:SF31 - TUBBY-LIKE F-BOX PROTEIN 1-RELATED	7_7670795	PF00646	F-box domain	PTHR16517	TUBBY-RELATED	Tub family proteins					KOG2502	GO:0005515
Phvul.008G039100	Phvul.008G039100.1	Chr08	3244621	3248022	(M=4) K08493 - vesicle transport through interaction with t-SNAREs 1 (VTI1)	8_3297300	PF05008	Vesicle transport v-SNARE protein N-terminus	PTHR21230	VESICLE TRANSPORT V-SNARE PROTEIN VTI1-RELATED	V-SNARE		vesicle transport through interaction with t-SNAREs 1	K08493		KOG1666	GO:0016020
Phvul.008G046900	Phvul.008G046900.1	Chr08	4028099	4032645	(M=2) PTHR24351:SF106 - PROTEIN KINASE	8_4065498	PF07714	Protein tyrosine kinase	PTHR24351	RIBOSOMAL PROTEIN S6 KINASE		Non-specific serine/threonine protein kinase.			2.7.11.1		GO:0006468
Phvul.008G094700	Phvul.008G094700.3	Chr08	9634757	9645452		8_9745242, 8_9745404, 8_10445211, 8_10445233, 8_10445234	PF07719	Tetratricopeptide repeat	PTHR23083	TETRATRICOPEPTIDE REPEAT PROTEIN, TPR	Molecular co-chaperone STI1					KOG0548
Phvul.008G101100	Phvul.008G101100.1	Chr08	15459838	15471993		8_11055006	PF03283	Pectinacetylesterase	PTHR21562	NOTUM-RELATED							GO:0016787
Phvul.008G117300	Phvul.008G117300.1	Chr08	14261059	14262137	(M=3) PTHR26374:SF167 - TRANSCRIPTIONAL REGULATOR SUPERMAN	8_14650681			PTHR26374	FAMILY NOT NAMED
Phvul.008G212500	Phvul.008G212500.1	Chr08	56062800	56065281	(M=1) PTHR27001:SF183 - PROTEIN LYK5	8_52409507	PF01476	LysM domain	PTHR27001		Serine/threonine protein kinase	Non-specific serine/threonine protein kinase.			2.7.11.1	KOG1187	GO:0006468
Phvul.008G221600	Phvul.008G221600.1	Chr08	57064847	57066507	(M=2) PTHR24198:SF33 - ANKYRIN REPEAT-CONTAINING PROTEIN	8_53411845, 8_53411889, 8_53411890, 8_53411898, 8_53411918, 8_53411925	PF00635	MSP (Major sperm protein) domain	PTHR24198	ANKYRIN REPEAT AND PROTEIN KINASE DOMAIN-CONTAINING PROTEIN	VAMP-associated protein involved in inositol metabolism					KOG0439
Phvul.008G221700	Phvul.008G221700.2	Chr08	57065449	57071608	(M=3) PTHR12585:SF26 - SISTER CHROMATID COHESION 1 PROTEIN 1	8_53411845, 8_53411889, 8_53411890, 8_53411898, 8_53411918, 8_53411925	PF04824	Conserved region of Rad21 / Rec8 like protein	PTHR12585	SCC1 / RAD21 FAMILY MEMBER	Sister chromatid cohesion complex Cohesin, subunit RAD21/SCC1		cohesin complex subunit SCC1	K06670		KOG1213	GO:0000228
Phvul.008G231700	Phvul.008G231700.1	Chr08	53530136	53533387	(M=4) PTHR32227:SF127 - CARBOHYDRATE-BINDING X8 DOMAIN-CONTAINING PROTEIN	8_54634639, 8_54634657, 8_54634761	PF07983	X8 domain	PTHR32227	FAMILY NOT NAMED		Glucan endo-1,3-beta-D-glucosidase.			3.2.1.39
Phvul.008G238500	Phvul.008G238500.1	Chr08	58710511	58712837	(M=2) PTHR22849:SF43 - U-BOX DOMAIN-CONTAINING PROTEIN 54-RELATED	8_55279132	PF04564	U-box domain	PTHR22849	WDSAM1 PROTEIN		Ubiquitin--protein ligase.			6.3.2.19		GO:0016567
Phvul.008G242800	Phvul.008G242800.1	Chr08	59133709	59142022	(M=1) K10867 - nijmegen breakage syndrome protein 1 (NBN, NBS1)	8_55705313	PF00498	FHA domain	PTHR12162	NIBRIN-RELATED			nijmegen breakage syndrome protein 1	K10867			GO:0005515
Phvul.008G247700	Phvul.008G247700.1	Chr08	59673672	59675574		8_56243789			PTHR36486
Phvul.008G259800	Phvul.008G259800.2	Chr08	60681394	60683630		8_57249436	PF00481	Protein phosphatase 2C	PTHR13832	PROTEIN PHOSPHATASE 2C		Phosphoprotein phosphatase.			3.1.3.16		GO:0003824
Phvul.008G291200	Phvul.008G291200.1	Chr08	62868399	62873897	(M=15) PF04782 - Protein of unknown function (DUF632) (DUF632)	8_59392111	PF04783	Protein of unknown function (DUF630)	PTHR21450	UNCHARACTERIZED
Phvul.008G291800	Phvul.008G291800.1	Chr08	62905298	62908086	(M=2) PTHR32002:SF3 - PROTEIN NLP1-RELATED	8_59429630	PF00564	PB1 domain	PTHR32002	FAMILY NOT NAMED							GO:0005515
Phvul.008G292100	Phvul.008G292100.1	Chr08	62939110	62948821	(M=2) PTHR11216:SF72 - CALCIUM-BINDING EF HAND-CONTAINING PROTEIN	8_59462830	PF13202	EF hand	PTHR11216	EH DOMAIN	Synaptic vesicle protein EHS-1 and related EH domain proteins					KOG0998	GO:0005509
Phvul.009G069100	Phvul.009G069100.2	Chr09	12096572	12099023		9_11708837	PF02984	Cyclin, C-terminal domain	PTHR10177	CYCLINE	G2/Mitotic-specific cyclin A		cyclin A	K06627		KOG0654	GO:0005634
Phvul.009G177300	Phvul.009G177300.1	Chr09	26394292	26401141	(M=1) PTHR12326 - PLECKSTRIN HOMOLOGY DOMAIN CONTAINING PROTEIN	9_25907901	PF00787	PX domain	PTHR12326	PLECKSTRIN HOMOLOGY DOMAIN CONTAINING PROTEIN							GO:0035091
Phvul.009G213000	Phvul.009G213000.1	Chr09	32199952	32208649	(M=3) PTHR24343:SF136 - CBL-INTERACTING SERINE/THREONINE-PROTEIN KINASE 23	9_31528587	PF14531	Kinase-like	PTHR24343	SERINE/THREONINE KINASE	Serine/threonine protein kinase	Non-specific serine/threonine protein kinase.			2.7.11.1	KOG0583	GO:0007165
Phvul.009G217900	Phvul.009G217900.1	Chr09	32977040	32999900	(M=1) K17600 - vacuolar protein sorting-associated protein 54 (VPS54)	9_32391895	PF10475	Protein of unknown function N-terminal domain (DUF2450)	PTHR12965	VACUOLAR PROTEIN SORTING 54	Vacuolar sorting protein VPS45			K17600		KOG2115	GO:0042147
Phvul.009G222100	Phvul.009G222100.1	Chr09	33493720	33497912	(M=3) PTHR31707:SF10 - PECTINESTERASE/PECTINESTERASE INHIBITOR 32-RELATED	9_32906856	PF04043	Plant invertase/pectin methylesterase inhibitor	PTHR31707	FAMILY NOT NAMED		Pectinesterase.	pectinesterase [EC:3.1.1.11]	K01051	3.1.1.11		GO:0004857
Phvul.009G257600	Phvul.009G257600.2	Chr09	37794932	37800422	(M=4) 1.1.3.37 - D-arabinono-1,4-lactone oxidase / D-arabinono-gamma-lactone oxidase	9_37039368	PF01565	FAD binding domain	PTHR13878	GULONOLACTONE OXIDASE		L-gulonolactone oxidase.			1.1.3.8		GO:0055114
Phvul.009G258300	Phvul.009G258300.2	Chr09	37824827	37829553	(M=3) K12130 - pseudo-response regulator 5 (PRR5)	9_37064739	PF06203	CCT motif	PTHR26402	RESPONSE REGULATOR OF TWO-COMPONENT SYSTEM			pseudo-response regulator 5	K12130			GO:0005515
Phvul.009G260800	Phvul.009G260800.1	Chr09	38072048	38081200	(M=4) PTHR24093:SF355 - ATPASE 1, PLASMA MEMBRANE-TYPE-RELATED	9_37310073	PF00690	Cation transporter/ATPase, N-terminus	PTHR24093	FAMILY NOT NAMED		Proton-exporting ATPase.	H+-transporting ATPase [EC:3.6.3.6]	K01535	3.6.3.6		GO:0046872
Phvul.010G142000	Phvul.010G142000.2	Chr10	42426092	42439661	(M=2) 1.4.1.4 - Glutamate dehydrogenase (NADP(+)) / Glutamic dehydrogenase	10_41408193, 10_41408198	PF02812	Glu/Leu/Phe/Val dehydrogenase, dimerisation domain	PTHR11606	GLUTAMATE DEHYDROGENASE		Glutamate dehydrogenase (NADP(+)).	glutamate dehydrogenase (NADP+) [EC:1.4.1.4]	K00262	1.4.1.4		GO:0055114
Phvul.011G045000	Phvul.011G045000.1	Chr11	4052750	4053871	(M=252) PF00076 - RNA recognition motif. (a.k.a. RRM, RBD, or RNP domain) (RRM_1)	11_3881959	PF00076	RNA recognition motif. (a.k.a. RRM, RBD, or RNP domain)	PTHR24012	FAMILY NOT NAMED							GO:0003676
